# Supplementary material for: Predicting Risk of Post-Operative Morbidity and Mortality following Gynaecological Oncology Surgery (PROMEGO): A Global Gynaecological Oncology Surgical Outcomes Collaborative Led Study
Source: MDPI journal article supplement (doi:10.3390/cancers16112021), 2024-05-26
Supplement: s1 [file cancers-2999215-supplementary tables.pdf › cancers-2999215-supplementary tables.pdf]

**Table S1:** Surgical complexity score

| <b>Pelvic surgery</b>              | <b>Score</b> |
|------------------------------------|--------------|
| Uterus                             | 1            |
| Cervix                             | 1            |
| Fallopian tube(s)                  | 1            |
| Ovary(s)                           | 1            |
| Upper vagina                       | 2            |
| Parametrium                        | 2            |
| Pelvic peritoneum                  | 2            |
| Total vagina                       | 3            |
| Obturator internus                 | 3            |
| Anus                               | 3            |
| Vulva                              | 3            |
| Sciatic nerve                      | 4            |
| Psoas major                        | 4            |
| Levator ani                        | 4            |
| <b>Bowel surgery</b>               |              |
| Omentum                            | 2            |
| Abdominal peritoneum               | 2            |
| Appendix                           | 2            |
| Mucous fistula                     | 2            |
| Large bowel stoma                  | 2            |
| Small bowel stoma                  | 2            |
| Rectum                             | 3            |
| Sigmoid                            | 3            |
| Ascending colon                    | 3            |
| Descending colon                   | 3            |
| Transverse colon                   | 3            |
| Duodenum                           | 3            |
| Jejunum                            | 3            |
| Ileum                              | 3            |
| Large bowel anastomosis            | 4            |
| Small bowel anastomosis            | 4            |
| <b>Urological surgery</b>          |              |
| Nephrostomy                        | 2            |
| Bladder                            | 3            |
| Ureter                             | 3            |
| Kidney                             | 3            |
| Urostomy/ileal conduit             | 3            |
| Ureteric reimplantation            | 4            |
| Trans uretero-ureteric anastomosis | 4            |
| <b>Upper abdominal surgery</b>     |              |
| Spleen                             | 3            |
| Liver capsule                      | 3            |
| Gall bladder                       | 3            |
| Diaphragm resection/stripping      | 3            |
| Liver parenchyma                   | 4            |
| Stomach                            | 4            |
| Pancreas                           | 4            |

|                        |   |
|------------------------|---|
| <b>Lymphadenectomy</b> |   |
| Pelvic                 | 3 |
| Para-aortic            | 3 |
| Inguinal               | 3 |

**Table S2:** Frequencies of candidate predictors for each iteration of Monte-Carlo cross-validation that has been used to develop the final linear regression model

| <b>Candidate predictor</b>                                                  | <b>Frequency (%) of being incorporated into the final linear regression model</b> |
|-----------------------------------------------------------------------------|-----------------------------------------------------------------------------------|
| Age                                                                         | 73.4                                                                              |
| *Surgery involving gastrointestinal/urological/vascular/thoracic procedures | 73.3                                                                              |
| FIGO stage                                                                  | 61.6                                                                              |
| Ethnicity                                                                   | 55.4                                                                              |
| ECOG status                                                                 | 53.9                                                                              |
| Neoadjuvant chemotherapy                                                    | 45                                                                                |
| BMI                                                                         | 30.8                                                                              |
| Previous minimal access surgery (laparoscopy/robotic)                       | 26.5                                                                              |
| Tumour origin                                                               | 26.4                                                                              |
| ASA grade                                                                   | 24.3                                                                              |
| Intra-operative antibiotics                                                 | 22.4                                                                              |
| Mechanical bowel preparation                                                | 20.7                                                                              |
| Surgical modality                                                           | 18.4                                                                              |
| Surgical complexity score                                                   | 18.1                                                                              |
| *Urgency of surgery (elective/emergency)                                    | 13.5                                                                              |
| Previous laparotomy                                                         | 13.2                                                                              |
| Preoperative haemoglobin                                                    | 7.8                                                                               |
| Preoperative white cell count                                               | 3.7                                                                               |

\*SORT calculator specific variables
